# Supplementary material
Source: PubMed Central journal article supplement (PMC4907172)
Supplement: AEM.00133-16_zam999117208so1.pdf [file AEM.00133-16_zam999117208so1.pdf]

|                  | Temperature (C)               | 4                             | 10                            | 17                             | 23                             | 28                            | 32                               | 35                            | 37                            |
|------------------|-------------------------------|-------------------------------|-------------------------------|--------------------------------|--------------------------------|-------------------------------|----------------------------------|-------------------------------|-------------------------------|
| IOWA_SWINE       | regression equation ( $R^2$ ) | $y = -0.007x + 3.891$ (0.802) | $y = -0.010x + 3.958$ (0.842) | $y = -0.024x + 3.819$ (0.864)  | $y = -0.0278x + 3.865$ (0.803) | $y = -0.155x + 3.846$ (0.850) | Not assessed at this temperature | $y = -0.184x + 3.883$ (0.931) | $y = -0.315x + 4.027$ (0.919) |
|                  | Rt (days)                     | 153.846                       | 98.039                        | 42.017                         | 35.842                         | 6.443                         |                                  | 5.438                         | 3.180                         |
|                  | # timepoints                  | 12                            | 12                            | 11                             | 11                             | 7                             |                                  | 6                             | 5                             |
| ILLINOIS_SWINE   | regression equation ( $R^2$ ) | $y = -0.006x + 4.153$ (0.719) | $y = -0.006x + 3.865$ (0.735) | $y = -0.018x + 4.054$ (0.897)  | $y = -0.033x + 4.126$ (0.887)  | $y = -0.092x + 3.936$ (0.873) |                                  | $y = -0.220x + 4.087$ (0.958) | $y = -0.468x + 4.212$ (0.959) |
|                  | Rt (days)                     | 178.571                       | 158.730                       | 55.249                         | 30.030                         | 10.834                        |                                  | 4.541                         | 2.136                         |
|                  | # timepoints                  | 14                            | 12                            | 10                             | 11                             | 9                             |                                  | 7                             | 4                             |
| MN02719_SWINE    | regression equation ( $R^2$ ) | $y = -0.004x + 4.402$ (0.977) | $y = -0.007x + 4.224$ (0.869) | $y = -0.015x + 4.149$ (0.713)  | $y = -0.021x + 4.168$ (0.837)  | $y = -0.106x + 4.451$ (0.917) |                                  | $y = -0.178x + 4.297$ (0.960) | $y = -0.314x + 4.291$ (0.994) |
|                  | Rt (days)                     | 250.00                        | 147.06                        | 66.23                          | 48.31                          | 9.48                          |                                  | 5.63                          | 3.19                          |
|                  | # timepoints                  | 12                            | 11                            | 8                              | 9                              | 7                             |                                  | 7                             | 6                             |
| MN02746_SWINE    | regression equation ( $R^2$ ) | $y = -0.005x + 5.580$ (0.655) | $y = -0.016x + 5.575$ (0.849) | $y = -0.028x + 5.230$ (0.711)  | $y = -0.034x + 4.932$ (0.783)  | $y = -0.158x + 5.022$ (0.844) |                                  | $y = -0.378x + 4.883$ (0.819) | $y = -0.727x + 5.171$ (0.841) |
|                  | Rt (days)                     | 192.308                       | 63.694                        | 36.364                         | 29.326                         | 6.337                         |                                  | 2.646                         | 1.376                         |
|                  | # timepoints                  | 13                            | 13                            | 9                              | 9                              | 8                             |                                  | 7                             | 5                             |
| MN02749_SWINE    | regression equation ( $R^2$ ) | $y = -0.006x + 5.268$ (0.767) | $y = -0.008x + 5.112$ (0.776) | $y = -0.018x + 5.152$ (0.816)  | $y = -0.027x + 5.147$ (0.821)  | $y = -0.113x + 5.369$ (0.975) |                                  | $y = -0.317x + 5.358$ (0.989) | $y = -0.655x + 5.038$ (0.916) |
|                  | Rt (days)                     | 172.414                       | 125.000                       | 54.348                         | 36.765                         | 8.873                         |                                  | 3.158                         | 1.526                         |
|                  | # timepoints                  | 14                            | 10                            | 9                              | 9                              | 9                             |                                  | 5                             | 4                             |
| MN02751_SWINE    | regression equation ( $R^2$ ) | $y = -0.005x + 5.551$ (0.927) | $y = -0.011x + 5.617$ (0.757) | $y = -0.021x + 5.409$ (0.820)  | $y = -0.035x + 5.417$ (0.915)  | $y = -0.193x + 5.316$ (0.898) | $y = -0.208x + 5.470$ (0.918)    | $y = -0.386x + 5.550$ (0.936) |                               |
|                  | Rt (days)                     | 200.000                       | 88.496                        | 47.393                         | 28.490                         | 5.179                         | 4.817                            | 2.590                         |                               |
|                  | # timepoints                  | 15                            | 11                            | 13                             | 13                             | 9                             | 9                                | 6                             |                               |
| NC02744_SWINE    | regression equation ( $R^2$ ) | $y = -0.006x + 4.510$ (0.729) | $y = -0.008x + 4.328$ (0.906) | $y = -0.018x + 4.414$ (0.907)  | $y = -0.027x + 4.283$ (0.931)  | $y = -0.101x + 4.365$ (0.946) | $y = -0.229x + 4.522$ (0.981)    | $y = -0.294x + 4.036$ (0.873) |                               |
|                  | Rt (days)                     | 178.571                       | 123.457                       | 55.556                         | 37.594                         | 9.911                         | 4.359                            | 3.407                         |                               |
|                  | # timepoints                  | 12                            | 14                            | 14                             | 13                             | 10                            | 7                                | 6                             |                               |
| Utah02861_SWINE  | regression equation ( $R^2$ ) | $y = -0.018x + 3.604$ (0.528) | $y = -0.035x + 3.496$ (0.403) | $y = -0.104x + 4.173$ (0.693)  | $y = -0.086x + 3.817$ (0.507)  | $y = -0.776x + 4.408$ (0.636) | $y = -3.230x + 5$ (0.997)        | $y = -3.230x + 5$ (0.997)     |                               |
|                  | Rt (days)                     | 56.180                        | 28.986                        | 9.634                          | 11.628                         | 1.289                         | 0.310                            | 0.310                         |                               |
|                  | # timepoints                  | 17                            | 12                            | 10                             | 13                             | 4                             | 3                                | 3                             |                               |
| NJ/1976_Human    | regression equation ( $R^2$ ) | $y = -0.005x + 4.687$ (0.605) | $y = -0.013x + 4.920$ (0.722) | $y = -0.021x + 4.833$ (0.909)  | $y = -0.053x + 5.066$ (0.805)  | $y = -0.114x + 5.136$ (0.861) | $y = -0.139x + 5.051$ (0.937)    | $y = -0.310x + 4.460$ (0.916) |                               |
|                  | Rt (days)                     | 222.222                       | 80.000                        | 47.847                         | 19.011                         | 8.780                         | 7.215                            | 3.223                         |                               |
|                  | # timepoints                  | 17                            | 19                            | 20                             | 12                             | 11                            | 11                               | 10                            |                               |
| Texas2009_Human  | regression equation ( $R^2$ ) | $y = -0.007x + 6.108$ (0.829) | $y = -0.018x + 5.991$ (0.739) | $y = -0.026x + 6.613$ (0.878)  | $y = -0.056x + 5.877$ (0.669)  | $y = -0.102x + 5.825$ (0.892) | $y = -0.144x + 5.910$ (0.927)    | $y = -0.299x + 6.130$ (0.948) |                               |
|                  | Rt (days)                     | 135.135                       | 55.866                        | 38.023                         | 17.794                         | 9.814                         | 6.959                            | 3.342                         |                               |
|                  | # timepoints                  | 21                            | 19                            | 18                             | 10                             | 12                            | 13                               | 11                            |                               |
| Brisbane10_Human | regression equation ( $R^2$ ) | $y = -0.008x + 5.733$ (0.940) | $y = -0.010x + 5.503$ (0.692) | $y = -0.013x + 5.649$ (0.572)  | $y = -0.049x + 5.577$ (0.798)  | $y = -0.091x + 5.603$ (0.863) | $y = -0.116x + 5.776$ (0.977)    | $y = -0.315x + 5.065$ (0.849) |                               |
|                  | Rt (days)                     | 125.000                       | 98.039                        | 76.923                         | 20.243                         | 10.989                        | 8.591                            | 3.173                         |                               |
|                  | # timepoints                  | 12                            | 16                            | 17                             | 11                             | 12                            | 8                                | 9                             |                               |
| Brisbane59_Human | regression equation ( $R^2$ ) | $y = -0.033x + 3.861$ (0.518) | $y = -0.042x + 3.590$ (0.642) | $y = -0.049x + 3.620$ (0.669)  | $y = -0.094x + 3.583$ (0.703)  | $y = -0.136x + 3.566$ (0.653) | $y = -0.158x + 3.731$ (0.847)    | $y = -0.248x + 3.150$ (0.694) |                               |
|                  | Rt (days)                     | 30.030                        | 23.697                        | 20.492                         | 10.695                         | 7.358                         | 6.329                            | 4.027                         |                               |
|                  | # timepoints                  | 6                             | 8                             | 10                             | 10                             | 9                             | 9                                | 6                             |                               |
| MX/INDRE_Human   | regression equation ( $R^2$ ) | $y = -0.029x + 2.967$ (0.482) | $y = -0.034x + 2.958$ (0.693) | $y = -0.0467x + 2.797$ (0.711) | $y = -0.106x + 3.625$ (0.653)  | $y = -0.179x + 3.955$ (0.762) | $y = -0.260x + 4.143$ (0.750)    | $y = -1.095x + 3.960$ (0.971) |                               |
|                  | Rt (days)                     | 34.602                        | 29.412                        | 21.413                         | 9.416                          | 5.593                         | 3.849                            | 0.913                         |                               |
|                  | # timepoints                  | 7                             | 7                             | 8                              | 9                              | 7                             | 6                                | 3                             |                               |
| CA04/2009_Human  | regression equation ( $R^2$ ) | $y = -0.010x + 5.265$ (0.406) | $y = -0.021x + 5.322$ (0.710) | $y = -0.038x + 5.662$ (0.647)  | $y = -0.055x + 5.559$ (0.756)  | $y = -0.114x + 5.272$ (0.852) | $y = -0.352x + 5.166$ (0.947)    | $y = -0.214x + 5.566$ (0.937) |                               |
|                  | Rt (days)                     | 101.010                       | 47.619                        | 26.110                         | 18.248                         | 8.787                         | 2.838                            | 4.682                         |                               |
|                  | # timepoints                  | 18                            | 20                            | 12                             | 12                             | 10                            | 5                                | 7                             |                               |
| LA/GWT_Avian     | regression equation ( $R^2$ ) | $y = -0.011x + 4.364$ (0.751) | $y = -0.018x + 4.179$ (0.829) | $y = -0.024x + 4.456$ (0.739)  | $y = -0.136x + 4.297$ (0.983)  | $y = -0.329x + 4.125$ (0.924) | $y = -0.650x + 4.190$ (0.927)    | $y = -1.840x + 4.400$ (0.880) |                               |
|                  | Rt (days)                     | 87.719                        | 57.143                        | 42.553                         | 7.358                          | 3.038                         | 1.538                            | 0.543                         |                               |
|                  | # timepoints                  | 10                            | 10                            | 10                             | 5                              | 5                             | 4                                | 3                             |                               |

Supplementary Table 1. Regression equations ( $R^2$  value), Rt value (days) and the number of timepoints collected for viruses within each temperature treatment

|                  | pH                                    | 5.4                         | 5.8                         | 6.2                         | 6.6                         | 7                           | 7.2                          | 7.4                         | 7.8                         | 8.2                         | 8.6                         | 9                           |
|------------------|---------------------------------------|-----------------------------|-----------------------------|-----------------------------|-----------------------------|-----------------------------|------------------------------|-----------------------------|-----------------------------|-----------------------------|-----------------------------|-----------------------------|
| IOWA_SWINE       | regression equation (R <sup>2</sup> ) | y = -0.226x + 3.728 (0.456) | y = -0.176x + 3.480 (0.690) | y = -0.114x + 3.606 (0.679) | y = -0.024x + 4.178 (0.924) | y = -0.076x + 3.477 (0.860) | y = -0.028x + 4.292 (0.883)  | y = -0.048x + 3.537 (0.671) | y = -0.095x + 4.088 (0.969) | y = -0.108x + 4.309 (0.919) | y = -0.059x + 3.644 (0.836) | y = -0.075x + 3.548 (0.717) |
|                  | Rt (days)                             | 4.421                       | 5.679                       | 8.795                       | 41.841                      | 13.123                      | 35.211                       | 21.053                      | 10.571                      | 9.285                       | 16.835                      | 13.316                      |
|                  | # timepoints                          | 5                           | 5                           | 7                           | 16                          | 5                           | 12                           | 9                           | 11                          | 7                           | 11                          | 9                           |
| ILLINOIS_SWINE   | regression equation (R <sup>2</sup> ) | y = -0.392x + 4.318 (0.913) | y = -0.317x + 4.232 (0.955) | y = -0.037x + 4.118 (0.921) | y = -0.022x + 4.428 (0.915) | y = -0.019x + 4.012 (0.827) | y = -0.0140x + 4.271 (0.846) | y = -0.018x + 4.148 (0.813) | y = -0.021x + 4.223 (0.813) | y = -0.029x + 4.238 (0.835) | y = -0.060x + 4.207 (0.948) | y = -0.102x + 4.162 (0.900) |
|                  | Rt (days)                             | 2.554                       | 3.158                       | 27.322                      | 45.455                      | 52.632                      | 71.942                       | 54.348                      | 48.309                      | 34.364                      | 16.611                      | 9.843                       |
|                  | # timepoints                          | 6                           | 19                          | 14                          | 19                          | 17                          | 17                           | 19                          | 18                          | 17                          | 9                           | 9                           |
| MN02719_SWINE    | regression equation (R <sup>2</sup> ) | y = -0.183x + 3.284 (0.556) | y = -0.129x + 3.855 (0.621) | y = -0.024x + 4.349 (0.853) | y = -0.020x + 4.474 (0.893) | y = -0.035x + 3.777 (0.789) | y = -0.021x + 4.395 (0.735)  | y = -0.025x + 3.980 (0.852) | y = -0.025x + 4.427 (0.723) | y = -0.039x + 4.598 (0.950) | y = -0.027x + 4.252 (0.787) | y = -0.037x + 4.088 (0.715) |
|                  | Rt (days)                             | 5.456                       | 7.764                       | 42.373                      | 50.251                      | 28.490                      | 47.170                       | 39.683                      | 40.323                      | 25.707                      | 36.496                      | 27.027                      |
|                  | # timepoints                          | 6                           | 7                           | 15                          | 19                          | 15                          | 16                           | 17                          | 16                          | 13                          | 16                          | 14                          |
| MN02746_SWINE    | regression equation (R <sup>2</sup> ) | y = -0.446x + 5.821 (0.780) | y = -0.415x + 5.991 (0.774) | y = -0.120x + 5.232 (0.837) | y = -0.031x + 5.775 (0.919) | y = -0.062x + 5.994 (0.930) | y = -0.019x + 5.818 (0.840)  | y = -0.049x + 5.383 (0.793) | y = -0.059x + 5.207 (0.921) | y = -0.083x + 4.649 (0.706) | y = -0.065x + 6.067 (0.936) | y = -0.067x + 5.647 (0.973) |
|                  | Rt (days)                             | 2.244                       | 2.410                       | 8.333                       | 32.468                      | 16.207                      | 53.191                       | 20.284                      | 16.920                      | 11.947                      | 15.408                      | 14.837                      |
|                  | # timepoints                          | 5                           | 5                           | 8                           | 20                          | 15                          | 19                           | 15                          | 12                          | 9                           | 15                          | 14                          |
| MN02749_SWINE    | regression equation (R <sup>2</sup> ) | y = -0.472x + 4.910 (0.821) | y = -1.264x + 4.313 (0.930) | y = -0.482x + 4.339 (0.623) | y = -0.028x + 5.424 (0.943) | y = -0.036x + 4.352 (0.794) | y = -0.016x + 5.369 (0.885)  | y = -0.043x + 4.581 (0.864) | y = -0.045x + 4.601 (0.732) | y = -0.037x + 4.548 (0.904) | y = -0.032x + 4.903 (0.745) | y = -0.039x + 4.819 (0.773) |
|                  | Rt (days)                             | 2.117                       | 0.791                       | 2.075                       | 36.101                      | 27.624                      | 61.728                       | 23.256                      | 22.124                      | 26.954                      | 31.746                      | 25.575                      |
|                  | # timepoints                          | 12                          | 3                           | 5                           | 18                          | 16                          | 18                           | 13                          | 14                          | 17                          | 17                          | 16                          |
| MN02751_SWINE    | regression equation (R <sup>2</sup> ) | y = -0.627x + 4.805 (0.951) | y = -0.645x + 4.506 (0.841) | y = -0.097x + 3.978 (0.739) | y = -0.074x + 4.606 (0.640) | y = -0.047x + 5.011 (0.819) | y = -0.019x + 5.655 (0.702)  | y = -0.035x + 4.855 (0.773) | y = -0.054x + 4.360 (0.714) | y = -0.585x + 5.272 (0.937) | y = -0.030x + 4.691 (0.809) | y = -0.041x + 4.606 (0.853) |
|                  | Rt (days)                             | 1.596                       | 1.551                       | 10.288                      | 13.550                      | 21.322                      | 53.763                       | 28.986                      | 18.416                      | 1.708                       | 33.784                      | 24.631                      |
|                  | # timepoints                          | 4                           | 7                           | 11                          | 8                           | 15                          | 15                           | 17                          | 15                          | 4                           | 14                          | 16                          |
| NCO2744_SWINE    | regression equation (R <sup>2</sup> ) | y = -0.527x + 4.076 (0.872) | y = -0.958x + 3.685 (0.964) | y = -0.417x + 3.439 (0.803) | y = -0.021x + 4.013 (0.868) | y = -0.113x + 3.795 (0.992) | y = -0.022x + 3.721 (0.516)  | y = -0.118x + 3.895 (0.931) | y = -0.114x + 3.699 (0.885) | y = -0.185x + 3.881 (0.821) | y = -0.051x + 3.912 (0.848) | y = -0.076x + 3.806 (0.828) |
|                  | Rt (days)                             | 1.897                       | 1.044                       | 2.399                       | 48.780                      | 8.889                       | 45.455                       | 8.467                       | 8.787                       | 5.414                       | 19.646                      | 13.089                      |
|                  | # timepoints                          | 4                           | 3                           | 7                           | 18                          | 7                           | 16                           | 7                           | 7                           | 6                           | 12                          | 12                          |
| Utah02861_SWINE  | regression equation (R <sup>2</sup> ) | y = -0.682x + 3.666 (0.568) | y = -1.735x + 3.505 (0.989) | y = -1.710x + 3.480 (0.999) | y = -2.125x + 3.895 (0.973) | y = -0.228x + 4.510 (0.987) | y = -0.160x + 3.471 (0.532)  | y = -0.219x + 4.400 (0.998) | y = -0.153x + 4.220 (0.989) | y = -1.701x + 3.480 (0.994) | y = -0.268x + 4.047 (0.836) | y = -0.464x + 4.579 (0.988) |
|                  | Rt (days)                             | 1.466                       | 0.576                       | 0.585                       | 0.471                       | 4.380                       | 6.270                        | 4.562                       | 6.545                       | 0.585                       | 3.729                       | 2.154                       |
|                  | # timepoints                          | 3                           | 2                           | 2                           | 2                           | 3                           | 2                            | 2                           | 4                           | 4                           | 6                           | 5                           |
| NJ/1976_Human    | regression equation (R <sup>2</sup> ) | y = -0.685x + 4.393 (0.956) | y = -0.660x + 4.370 (0.911) | y = -0.218x + 3.815 (0.624) | y = -0.042x + 4.633 (0.943) | y = -0.055x + 4.370 (0.708) | y = -0.021x + 4.833 (0.909)  | y = -0.041x + 4.243 (0.750) | y = -0.035x + 4.331 (0.727) | y = -0.182x + 3.851 (0.771) | y = -0.087x + 4.998 (0.937) | y = -0.084x + 4.692 (0.871) |
|                  | Rt (days)                             | 1.460                       | 1.515                       | 4.583                       | 24.038                      | 18.282                      | 47.847                       | 24.570                      | 28.736                      | 5.501                       | 11.521                      | 11.976                      |
|                  | # timepoints                          | 7                           | 7                           | 9                           | 13                          | 12                          | 20                           | 15                          | 16                          | 4                           | 10                          | 11                          |
| Texas2009_Human  | regression equation (R <sup>2</sup> ) | y = -0.814x + 5.848 (0.897) | y = -0.766x + 6.126 (0.890) | y = -0.060x + 5.674 (0.879) | y = -0.031x + 6.011 (0.925) | y = -0.043x + 5.663 (0.853) | y = -0.026x + 6.613 (0.878)  | y = -0.039x + 5.775 (0.912) | y = -0.038x + 5.941 (0.920) | y = -0.120x + 5.752 (0.922) | y = -0.063x + 5.955 (0.912) | y = -0.087x + 5.843 (0.906) |
|                  | Rt (days)                             | 1.229                       | 1.306                       | 16.584                      | 31.949                      | 23.419                      | 38.023                       | 25.510                      | 26.178                      | 8.313                       | 15.823                      | 11.547                      |
|                  | # timepoints                          | 5                           | 6                           | 17                          | 18                          | 17                          | 18                           | 18                          | 19                          | 8                           | 16                          | 17                          |
| Brisbane10_Human | regression equation (R <sup>2</sup> ) | y = -0.568x + 4.653 (0.714) | y = -0.755x + 5.107 (0.865) | y = -0.115x + 4.515 (0.786) | y = -0.031x + 4.597 (0.870) | y = -0.024x + 5.753 (0.757) | y = -0.013x + 5.649 (0.572)  | y = -0.014x + 5.617 (0.745) | y = -0.030x + 5.572 (0.923) | y = -0.060x + 4.862 (0.923) | y = -0.032x + 4.422 (0.511) | y = -0.049x + 4.262 (0.796) |
|                  | Rt (days)                             | 1.761                       | 1.324                       | 8.696                       | 32.787                      | 40.984                      | 76.923                       | 69.930                      | 33.003                      | 16.584                      | 31.447                      | 20.367                      |
|                  | # timepoints                          | 6                           | 4                           | 10                          | 18                          | 18                          | 17                           | 18                          | 19                          | 10                          | 15                          | 15                          |
| Brisbane59_Human | regression equation (R <sup>2</sup> ) | y = -0.375x + 4.057 (0.583) | y = -0.411x + 4.217 (0.810) | y = -0.127x + 3.385 (0.665) | y = -0.042x + 3.346 (0.605) | y = -0.085x + 4.422 (0.941) | y = -0.048x + 4.056 (0.918)  | y = -0.086x + 3.206 (0.826) | y = -0.078x + 4.374 (0.922) | y = -0.237x + 3.830 (0.855) | y = -0.106x + 3.423 (0.803) | y = -0.108x + 3.172 (0.540) |
|                  | Rt (days)                             | 2.667                       | 2.434                       | 7.893                       | 23.753                      | 11.737                      | 21.008                       | 11.574                      | 12.821                      | 4.228                       | 9.259                       | 9.268                       |
|                  | # timepoints                          | 4                           | 5                           | 9                           | 11                          | 5                           | 9                            | 4                           | 6                           | 5                           | 8                           | 8                           |
| MX/INDRE_Human   | regression equation (R <sup>2</sup> ) | y = -0.405x + 5.593 (0.861) | y = -0.341x + 5.422 (0.825) | y = -0.191x + 3.429 (0.495) | y = -0.092x + 2.943 (0.572) | y = -0.054x + 4.402 (0.910) | y = -0.069x + 3.081 (0.581)  | y = -0.059x + 4.468 (0.860) | y = -0.088x + 4.623 (0.844) | y = -0.474x + 4.145 (0.746) | y = -0.143x + 3.960 (0.795) | y = -0.239x + 3.893 (0.743) |
|                  | Rt (days)                             | 2.470                       | 2.934                       | 5.236                       | 10.893                      | 18.587                      | 14.430                       | 16.978                      | 11.429                      | 2.108                       | 6.978                       | 4.184                       |
|                  | # timepoints                          | 5                           | 5                           | 7                           | 7                           | 11                          | 8                            | 11                          | 9                           | 5                           | 9                           | 6                           |
| CA04/2009_Human  | regression equation (R <sup>2</sup> ) | y = -0.671x + 3.802 (0.483) | y = -0.275x + 4.379 (0.693) | y = -0.052x + 4.462 (0.567) | y = -0.021x + 4.258 (0.484) | y = -0.027x + 5.445 (0.822) | y = -0.016x + 4.745 (0.418)  | y = -0.021x + 5.214 (0.814) | y = -0.030x + 4.628 (0.633) | y = -0.035x + 5.055 (0.872) | y = -0.049x + 4.663 (0.813) | y = -0.057x + 4.983 (0.878) |
|                  | Rt (days)                             | 1.490                       | 3.640                       | 19.231                      | 48.544                      | 37.313                      | 64.516                       | 48.077                      | 33.333                      | 28.818                      | 20.534                      | 17.575                      |
|                  | # timepoints                          | 5                           | 6                           | 10                          | 17                          | 17                          | 17                           | 14                          | 14                          | 14                          | 11                          | 13                          |
| LA/GWT_Avian     | regression equation (R <sup>2</sup> ) | y = -2.345x + 4.115 (0.975) | y = -0.065x + 3.536 (0.550) | y = -0.033x + 4.927 (0.829) | y = -0.023x + 5.121 (0.689) | y = -0.023x + 4.540 (0.862) | y = -0.024x + 4.456 (0.739)  | y = -0.021x + 4.138 (0.730) | y = -0.026x + 4.166 (0.716) | y = -0.035x + 4.004 (0.704) | y = -0.076x + 4.329 (0.935) | y = -0.060x + 4.253 (0.745) |
|                  | Rt (days)                             | 0.426                       | 15.456                      | 30.769                      | 42.194                      | 43.860                      | 42.553                       | 46.729                      | 38.760                      | 28.490                      | 13.210                      | 16.750                      |
|                  | # timepoints                          | 4                           | 14                          | 17                          | 17                          | 18                          | 10                           | 18                          | 18                          | 11                          | 6                           | 8                           |

Supplementary Table 2. Regression equations (R<sup>2</sup> value), Rt value (days) and the number of timepoints collected for viruses within each pH treatment

|                  | Salinity (ppt)                        | 0ppt                         | 5ppt                        | 10ppt                        | 15ppt                       | 20ppt                       | 25ppt                        | 30ppt                       |
|------------------|---------------------------------------|------------------------------|-----------------------------|------------------------------|-----------------------------|-----------------------------|------------------------------|-----------------------------|
| IOWA_SWINE       | regression equation (R <sup>2</sup> ) | y = -0.028x + 4.292 (0.883)  | y = -0.070x + 4.236 (0.929) | y = -0.143x + 4.036 (0.933)  | y = -0.150x + 3.938 (0.968) | y = -0.155x + 3.411 (0.816) | y = -0.160x + 3.716 (0.882)  | y = -0.170x + 3.385 (0.667) |
|                  | Rt (days)                             | 35.211                       | 14.388                      | 6.978                        | 6.676                       | 6.472                       | 6.227                        | 5.869                       |
|                  | # timepoints                          | 12                           | 10                          | 7                            | 7                           | 6                           | 9                            | 11                          |
| ILLINOIS_SWINE   | regression equation (R <sup>2</sup> ) | y = -0.0140x + 4.271 (0.846) | y = -0.037x + 4.395 (0.893) | y = -0.065x + 4.206 (0.890)  | y = -0.033x + 4.164 (0.838) | y = -0.042x + 3.896 (0.873) | y = -0.0420x + 3.883 (0.629) | y = -0.055x + 3.750 (0.870) |
|                  | Rt (days)                             | 71.942                       | 26.738                      | 15.361                       | 25.445                      | 23.753                      | 23.866                       | 18.083                      |
|                  | # timepoints                          | 17                           | 13                          | 10                           | 13                          | 13                          | 12                           | 9                           |
| MN02719_SWINE    | regression equation (R <sup>2</sup> ) | y = -0.021x + 4.395 (0.735)  | y = -0.037x + 4.602 (0.906) | y = -0.035x + 4.423 (0.910)  | y = -0.031x + 4.410 (0.883) | y = -0.040x + 4.139 (0.856) | y = -0.097x + 4.647 (0.909)  | y = -0.100x + 4.455 (0.888) |
|                  | Rt (days)                             | 47.170                       | 26.810                      | 28.409                       | 32.680                      | 24.752                      | 10.341                       | 10.050                      |
|                  | # timepoints                          | 16                           | 15                          | 17                           | 17                          | 15                          | 12                           | 13                          |
| MN02746_SWINE    | regression equation (R <sup>2</sup> ) | y = -0.019x + 5.818 (0.840)  | y = -0.046x + 5.820 (0.953) | y = -0.096x + 5.752 (0.911)  | y = -0.062x + 5.687 (0.924) | y = -0.070x + 5.533 (0.915) | y = -0.077x + 5.526 (0.888)  | y = -0.112x + 5.605 (0.865) |
|                  | Rt (days)                             | 53.191                       | 21.692                      | 10.406                       | 16.077                      | 14.388                      | 13.055                       | 8.945                       |
|                  | # timepoints                          | 19                           | 17                          | 12                           | 13                          | 14                          | 14                           | 15                          |
| MN02749_SWINE    | regression equation (R <sup>2</sup> ) | y = -0.016x + 5.369 (0.885)  | y = -0.061x + 4.980 (0.954) | y = -0.067x + 5.009 (0.948)  | y = -0.069x + 4.901 (0.777) | y = -0.099x + 4.763 (0.860) | y = -0.099x + 4.887 (0.887)  | y = -0.131x + 4.964 (0.838) |
|                  | Rt (days)                             | 61.728                       | 16.529                      | 14.859                       | 14.556                      | 10.142                      | 10.060                       | 7.634                       |
|                  | # timepoints                          | 18                           | 12                          | 13                           | 16                          | 12                          | 12                           | 12                          |
| MN02751_SWINE    | regression equation (R <sup>2</sup> ) | y = -0.019x + 5.655 (0.702)  | y = -0.040x + 5.069 (0.884) | y = -0.061x + 5.149 (0.928)  | y = -0.065x + 5.004 (0.916) | y = -0.039x + 4.277 (0.807) | y = -0.103x + 4.790 (0.896)  | y = -0.118x + 4.873 (0.856) |
|                  | Rt (days)                             | 53.763                       | 24.814                      | 16.313                       | 15.480                      | 25.707                      | 9.709                        | 8.496                       |
|                  | # timepoints                          | 15                           | 13                          | 13                           | 11                          | 14                          | 13                           | 12                          |
| NC02744_SWINE    | regression equation (R <sup>2</sup> ) | y = -0.022x + 3.721 (0.516)  | y = -0.059x + 3.976 (0.908) | y = -0.078x + 3.817 (0.862)  | y = -0.034x + 4.230 (0.682) | y = -0.050x + 4.211 (0.798) | y = -0.088x + 3.797 (0.889)  | y = -0.078x + 4.134 (0.781) |
|                  | Rt (days)                             | 45.455                       | 16.892                      | 12.804                       | 29.155                      | 19.920                      | 11.364                       | 12.903                      |
|                  | # timepoints                          | 16                           | 10                          | 11                           | 14                          | 16                          | 12                           | 14                          |
| Utah02861_SWINE  | regression equation (R <sup>2</sup> ) | y = -0.160x + 3.471 (0.532)  | y = -0.088x + 4.913 (0.930) | y = -0.104x + 4.812 (0.948)  | y = -0.084x + 3.539 (0.795) | y = -0.072x + 3.738 (0.886) | y = -0.090x + 3.881 (0.700)  | y = -0.133x + 4.060 (0.898) |
|                  | Rt (days)                             | 6.270                        | 11.325                      | 9.653                        | 11.976                      | 13.947                      | 11.173                       | 7.547                       |
|                  | # timepoints                          | 8                            | 9                           | 10                           | 11                          | 11                          | 10                           | 10                          |
| NJ/1976_Human    | regression equation (R <sup>2</sup> ) | y = -0.021x + 4.833 (0.909)  | y = -0.066x + 5.331 (0.948) | y = -0.089x + 5.0623 (0.918) | y = -0.091x + 4.782 (0.851) | y = -0.092x + 4.554 (0.806) | y = -0.067x + 4.449 (0.684)  | y = -0.084x + 4.141 (0.689) |
|                  | Rt (days)                             | 47.847                       | 15.221                      | 11.299                       | 10.941                      | 10.858                      | 14.925                       | 11.848                      |
|                  | # timepoints                          | 20                           | 12                          | 11                           | 12                          | 14                          | 13                           | 13                          |
| Texas2009_Human  | regression equation (R <sup>2</sup> ) | y = -0.026x + 6.6130 (0.878) | y = -0.051x + 5.187 (0.850) | y = -0.055x + 5.452 (0.894)  | y = -0.054x + 4.689 (0.704) | y = -0.061x + 4.311 (0.669) | y = -0.148x + 5.041 (0.836)  | y = -0.154x + 5.059 (0.835) |
|                  | Rt (days)                             | 38.023                       | 19.685                      | 18.349                       | 18.416                      | 16.447                      | 6.748                        | 6.506                       |
|                  | # timepoints                          | 18                           | 16                          | 16                           | 14                          | 17                          | 11                           | 11                          |
| Brisbane10_Human | regression equation (R <sup>2</sup> ) | y = -0.013x + 5.649 (0.572)  | y = -0.081x + 5.994 (0.957) | y = -0.188x + 5.287 (0.784)  | y = -0.052x + 4.804 (0.744) | y = -0.115x + 4.696 (0.883) | y = -0.251x + 5.419 (0.931)  | y = -0.241x + 5.312 (0.813) |
|                  | Rt (days)                             | 76.923                       | 12.346                      | 5.333                        | 19.417                      | 8.726                       | 3.981                        | 4.143                       |
|                  | # timepoints                          | 17                           | 9                           | 9                            | 14                          | 14                          | 8                            | 8                           |
| Brisbane59_Human | regression equation (R <sup>2</sup> ) | y = -0.048x + 4.056 (0.918)  | y = -0.048x + 4.264 (0.915) | y = -0.175x + 3.546 (0.762)  | y = -0.127x + 3.476 (0.657) | y = -0.105x + 3.154 (0.558) | y = -0.138x + 3.235 (0.812)  | y = -0.135x + 3.540 (0.694) |
|                  | Rt (days)                             | 21.008                       | 20.877                      | 5.701                        | 7.868                       | 9.569                       | 7.231                        | 7.386                       |
|                  | # timepoints                          | 9                            | 11                          | 6                            | 10                          | 10                          | 9                            | 10                          |
| MX/INDRE_Human   | regression equation (R <sup>2</sup> ) | y = -0.069x + 3.081 (0.581)  | y = -0.086x + 3.894 (0.809) | y = -0.108x + 3.678 (0.641)  | y = -0.098x + 3.650 (0.752) | y = -0.226x + 4.674 (0.853) | y = -0.112x + 3.594 (0.710)  | y = -0.124x + 3.771 (0.741) |
|                  | Rt (days)                             | 14.430                       | 11.614                      | 9.302                        | 10.256                      | 4.433                       | 8.953                        | 8.039                       |
|                  | # timepoints                          | 8                            | 7                           | 11                           | 12                          | 7                           | 10                           | 9                           |
| CA04/2009_Human  | regression equation (R <sup>2</sup> ) | y = -0.016x + 4.745 (0.418)  | y = -0.061x + 4.315 (0.767) | y = -0.090x + 4.218 (0.846)  | y = -0.122x + 4.560 (0.901) | y = -0.173x + 4.550 (0.948) | y = -0.201x + 4.941 (0.940)  | y = -0.194x + 4.214 (0.850) |
|                  | Rt (days)                             | 64.516                       | 16.474                      | 11.099                       | 8.210                       | 5.767                       | 4.975                        | 5.152                       |
|                  | # timepoints                          | 6                            | 7                           | 8                            | 6                           | 4                           | 4                            | 4                           |
| LA/GWT_Avian     | regression equation (R <sup>2</sup> ) | y = -0.016x + 4.493 (0.536)  | y = -0.073x + 4.351 (0.859) | y = -0.084x + 4.302 (0.795)  | y = -0.074x + 4.012 (0.755) | y = -0.096x + 4.020 (0.733) | y = -0.148x + 4.489 (0.926)  | y = -0.188x + 4.798 (0.828) |
|                  | Rt (days)                             | 64.103                       | 13.624                      | 11.976                       | 13.532                      | 10.471                      | 6.775                        | 5.330                       |
|                  | # timepoints                          | 10                           | 6                           | 7                            | 7                           | 6                           | 4                            | 4                           |

Supplementary Table 3. Regression equations (R<sup>2</sup> value), Rt value (days) and the number of timepoints collected for viruses within each salinity treatment
